# Supplementary material for: The immunosuppressive effect of the tick protein, Salp15, is long-lasting and persists in a murine model of hematopoietic transplant
Source: PubMed Central journal article supplement (PMC5587732; doi:10.1038/s41598-017-11354-2), 2017-09-06
Supplement: 41598_2017_11354_MOESM1_ESM.pdf [file 41598_2017_11354_MOESM1_ESM.pdf]

1 **The immunosuppressive effect of the tick protein, Salp15,**  
2 **is long-lasting and persists in a murine model of**  
3 **hematopoietic transplant**

4 Julen Tomás-Cortázar <sup>1</sup>, Itziar Martín-Ruiz <sup>1</sup>, Diego Barriales <sup>1</sup>, Miguel Ángel  
5 Pascual-Itoiz <sup>1</sup>, Virginia Gutiérrez de Juan <sup>1</sup>, Alfredo Caro-Maldonado <sup>1</sup>, Nekane  
6 Merino <sup>1</sup>, Alberto Marina <sup>1</sup>, Francisco J. Blanco <sup>1,2</sup>, Juana María Flores <sup>3</sup>, James D.  
7 Sutherland <sup>1</sup>, Rosa Barrio <sup>1</sup>, Adriana Rojas <sup>1</sup>, María Luz Martínez-Chantar <sup>1,4</sup>, Arkaitz  
8 Carracedo <sup>1,2,5,6</sup>, Carolina Simó <sup>7</sup>, Virginia García-Cañas <sup>7</sup>, Leticia Abecia <sup>1</sup>, José Luis  
9 Lavín <sup>1</sup>, Ana M. Aransay <sup>1,4</sup>, Héctor Rodríguez <sup>1</sup>, Juan Anguita <sup>1,2,\*</sup>

10 <sup>1</sup> CIC bioGUNE. 48160 Derio, Bizkaia, Spain.

11 <sup>2</sup> Ikerbasque, Basque Foundation for Science. 48013 Bilbao, Bizkaia, Spain.

12 <sup>3</sup> Department of Animal Medicine and Surgery. School of Veterinary Medicine.  
13 Complutense University of Madrid. 28040 Madrid, Spain.

14 <sup>4</sup> Centro de Investigación Biomédica en Red de enfermedades hepáticas y digestivas  
15 (CIBERehd) and <sup>5</sup> Centro de Investigación Biomédica en Red en cáncer (CIBERonc),  
16 Instituto de Salud Carlos III. 28029 Madrid, Spain.

17 <sup>6</sup> Department of Biochemistry and Molecular Biology. University of the Basque Country.  
18 48940 Leioa, Bizkaia, Spain.

19 <sup>7</sup> Molecular Nutrition and Metabolism, Institute of Food Science Research (CIAL, CSIC).  
20 28049 Madrid, Spain.

21

22 \*Correspondence: Juan Anguita, PhD. CIC bioGUNE. Parque Tecnológico de Bizkaia,  
23 48160 Derio, Bizkaia, Spain. +34 944 061 311. [janguita@cicbiogune.es](mailto:janguita@cicbiogune.es)

1 **Supplementary Fig. S1. Validation of the RNAseq on selected genes.**

2 Normalized reads (top) and fold induction changes by qRT-PCR (bottom) of a  
 3 group of selected genes differentially regulated in CD4 T cells activated with anti-  
 4 CD3/CD28 for 2 days in the presence of Salp15 (S) or Salp15ΔP11 (C). U: Non-  
 5 stimulated CD4 T cells.

6

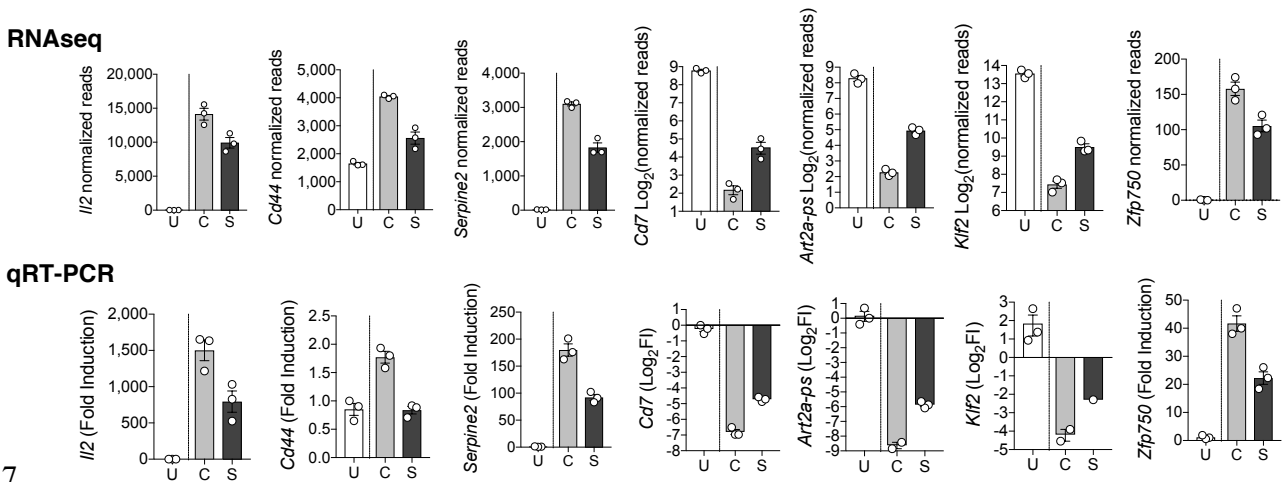

7

8

1 **Supplementary Fig. S2. Gene Ontology analysis of genes affected by Salp15 at**  
 2 **2 days.** Ten most over-represented Gene Ontology of Biological Processes (GOBP)  
 3 groups affected by Salp15 on activating CD4 T cells. The number of genes (white  
 4 circles) and the adjusted p values (black circles) are presented.  
 5

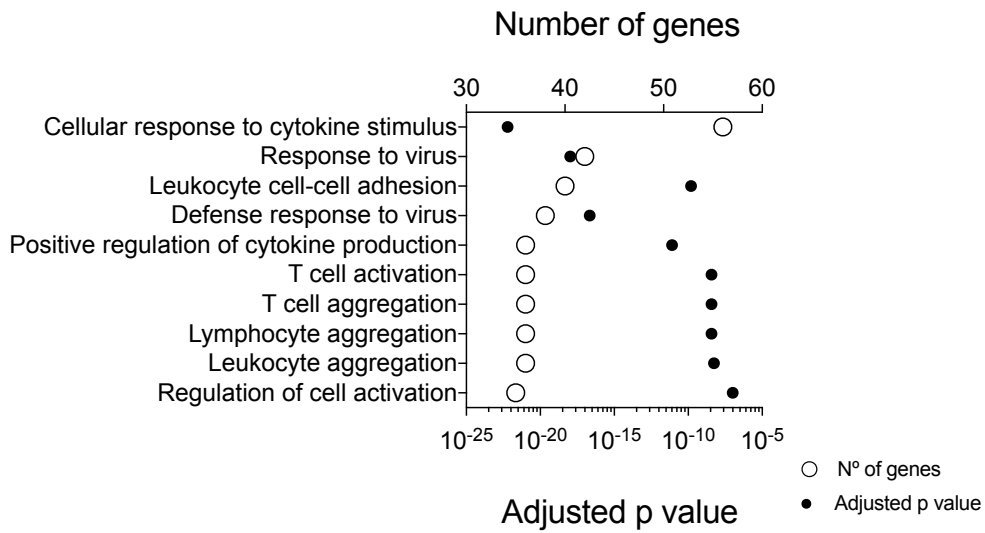

6  
7

- 1 **Supplementary Fig. S3. Gating strategy to identify the populations in ovalbumin-immunized mice. (A)** B cell populations in the
- 2 blood. (B) CD25 (top right blot), CD44 (bottom left blot) and anergic CD4 T cells (bottom right blot) in the spleen. (C) CD4+NRP1+
- 3 (Tregs; top right blot) and myeloid populations in the spleen.

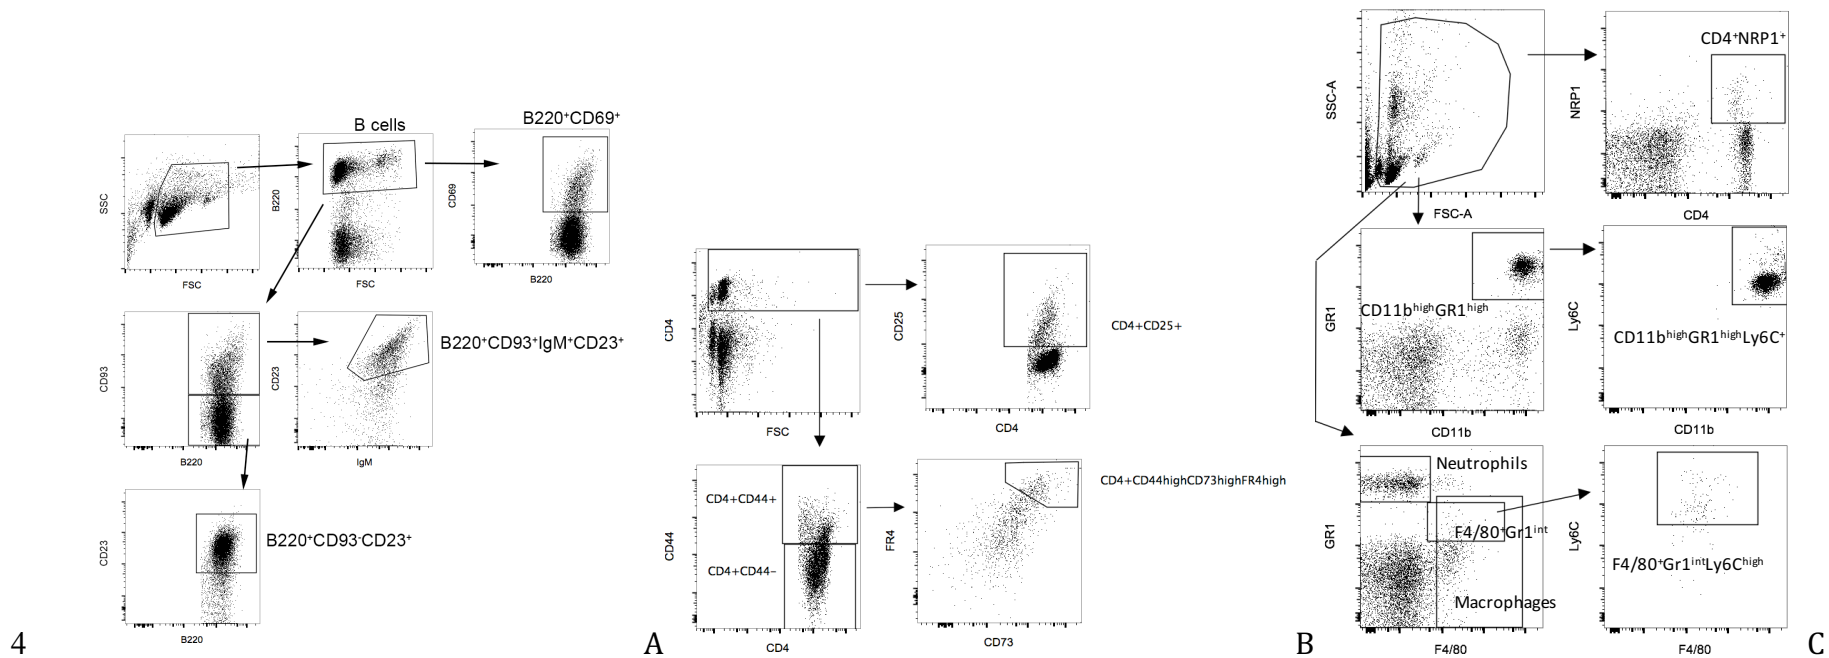

1 **Supplementary Fig. S4. Salp15 does not affect Th1 or Th2 differentiation in**  
 2 **immunized mice.** (A) Heatmap representing the genes associated with CD4 T cell  
 3 differentiation according to the transcriptomic analysis in the presence of Salp15  
 4 (S) or Salp15 $\Delta$ P11 (C) at 2 and 4 days of activation. (B) Ovalbumin/KLH-  
 5 immunized mice (see Materials and Methods) were sacrificed at day 21 and whole  
 6 splenocytes ( $3 \times 10^6$ /ml) were restimulated with ovalbumin (Ova) or KLH. The  
 7 restimulation supernatants were analyzed for IFN $\gamma$  and IL-4 by capture ELISA. The  
 8 levels of IFN $\gamma$  were below the detection limit. No differences were observed  
 9 between Salp15- or Salp15 $\Delta$ P11 (control)-treated, immunized mice ( $p > 0.05$ , 2-  
 10 way ANOVA). The data represent 10 mice in each group immunized with  
 11 ovalbumin and 5 per group with KLH and are representative of 2 independent  
 12 experiments.

13

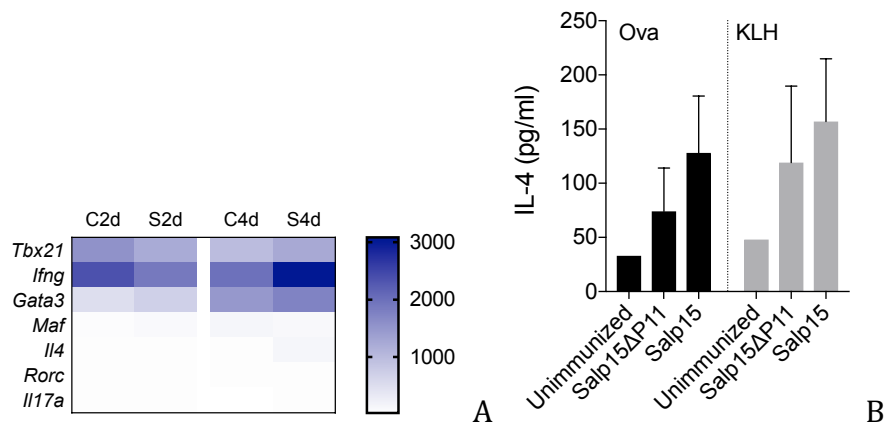

14

15
